# Supplementary material for: Distribution of Prophages in the Oenococcus oeni Species
Source: MDPI journal article supplement (doi:10.3390/microorganisms9040856), 2021-04-16
Supplement: s1 [file s1]

**Table S1** Genomes of lysogenic and non-lysogenic strains of *O. oeni* used in this study.

| Strain characteristics     | Genome accession number                                                                                                                                                                                                                                                                                                                                                                                                                                                                                                                                                                                                                                                                                                                                                                                                                                                                                                                                                                                                                                                                                       |
|----------------------------|---------------------------------------------------------------------------------------------------------------------------------------------------------------------------------------------------------------------------------------------------------------------------------------------------------------------------------------------------------------------------------------------------------------------------------------------------------------------------------------------------------------------------------------------------------------------------------------------------------------------------------------------------------------------------------------------------------------------------------------------------------------------------------------------------------------------------------------------------------------------------------------------------------------------------------------------------------------------------------------------------------------------------------------------------------------------------------------------------------------|
| Lysogens (134)             | ACSE01, AJIJ01, AJTO01, ALAD01, ALAE01, ALAG01, ALAH01, ALAJ01, ALAK01, AZHH01, AZIP01, AZJU01, AZJV01, AZJW01, AZJX01, AZJY01, AZKA01, AZKB01, AZKC01, AZKE01, AZKF01, AZKH01, AZKJ01, AZKL01, AZLG01, AZLK01, AZLN01, AZLP01, CP014324, CP027431, CP038451, JPEK01, JPEM01, LKRT01, LKRU01, LKRV01, LKRZ01, LKSA01, LKSB01, LKSC01, LKSD01, LKSE01, LKSR01, MLKP01, MLKQ01, MLKT01, MLKZ01, MLLA01, MLLB01, MLLD01, MLLE01, MLLG01, MLLK01, MLLM01, MLLN01, MLLQ01, MLLS01, MLLU01, MLLX01, MLLZ01, MLMF01, MLMI01, MLMJ01, MLMK01, MLMP01, MLMT01, MLMW01, MLMY01, MLMZ01, MLNA01, MLNC01, MLND01, MLNE01, MLNH01, MLNK01, MLNL01, MLNN01, MLNP01, MLNQ01, MLNS01, MLNU01, MLNV01, MLNX01, MLNY01, MLNZ01, MLOA01, MLOB01, MLOC01, MLOE01, MLOF01, MLOG01, MLOH01, MLOI01, MLOJ01, MLOL01, MLON01, MLOO01, MLOP01, MLOU01, MLOW01, MLOX01, MLOY01, MLPB01, MLPC01, MLPD01, MLPE01, MLPG01, MLPH01, MLPI01, MLPK01, MLPL01, MLPN01, MLPQ01, MLPR01, MLPS01, MLPT01, MLPV01, MLPW01, MLPX01, MLPY01, SNST01, SNSU01, SNSV01, SNSW01, SNSX01, SNSY01, ULFS01, ULFU01, ULFZ01, ULGA01, ULGB01, ULGC01, ULGD01. |
| Non-lysogenic strains (97) | AAUV01, ALAF01, ALAI01, AZJZ01, AZKD01, AZKG01, AZKI01, AZKK01, AZLE01, AZLF01, AZLH01, AZLI01, AZLJ01, AZLL01, AZLM01, AZLO01, AZLQ01, AZLR01, AZLS01, AZLT01, CP008528, JMIS01, JOOH01, JPEJ01, JPEL01, LKRS01, LKRW01, LKRX01, LKRY01, LOBV01, LR031358, MDWO01, MEHP01, MLKR01, MLKS01, MLKU01, MLKV01, MLKW01, MLKX01, MLKY01, MLLC01, MLLF01, MLLH01, MLLI01, MLLJ01, MLLL01, MLLP01, MLLR01, MLLT01, MLLV01, MLLW01, MLLY01, MLMA01, MLMB01, MLMC01, MLMD01, MLME01, MLMG01, MLMH01, MLML01, MLMN01, MLMO01, MLMQ01, MLMR01, MLMS01, MLMU01, MLMV01, MLMX01, MLNB01, MLNF01, MLNG01, MLNI01, MLNJ01, MLNM01, MLNO01, MLNR01, MLNT01, MLNW01, MLOD01, MLOK01, MLOM01, MLOQ01, MLOR01, MLOS01, MLOV01, MLOZ01, MLPA01, MLPF01, MLPJ01, MLPM01, MLPO01, MLPP01, QYTB01, ULFT01, ULFV01, ULFW01, ULFX01.                                                                                                                                                                                                                                                                                                   |

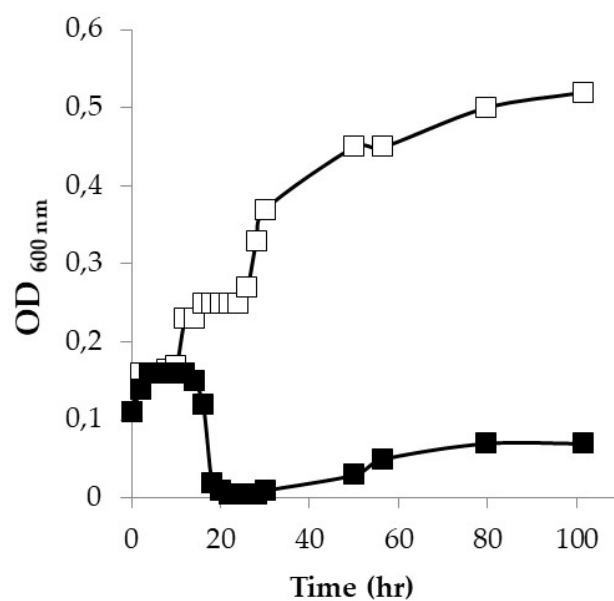

**Figure S1** Kinetics of bacteriophage induction from the lysogen *O. oeni* IOEB0608 with (■) and without (□) mitomycin C treatment (1 µg/mL). Each culture was grown in MRS broth to an OD<sub>600</sub> of 0.2-0.3 and then separated into two aliquots, one of which was induced with mitomycin C.

|                    |                                                               |     |
|--------------------|---------------------------------------------------------------|-----|
| Int <sub>F</sub>   | MATIAVQSKTKTYRVQIIITPDHKRVGKSGFHTKTAAKTWLTENQLKIVTGKSEVNSSHEL | 60  |
| Int <sub>B-F</sub> | MASITYQEKVKTYRVQVTTKGHKRVGKSGFRTKTEARKWLTENELKIMTGKSDLIDSSKL  | 60  |
| Int <sub>F</sub>   | LSDYFKHWYETYKTNVTDITLDQYKTTYRIIEKYLPHVRLNDFTREKYQKFLNKYGEDHA  | 120 |
| Int <sub>B-F</sub> | LSSYFEHWYETYKTNVTDITLDQYKTTYRIIEKKYLPHARLNNFTREYQKFLNKYGDHA   | 120 |
| Int <sub>F</sub>   | KETVAKRKTHISACLKDAFADKLISEDITQRITLTGKAGKSSELKFLEYEDFKNLEQYSY  | 180 |
| Int <sub>B-F</sub> | KETVAKRKTHISACLKDAFADKLISEDITQRITLTGKAGKSSELKFLEADDFKRLEQYSY  | 180 |
| Int <sub>F</sub>   | DHLNNDSQLAIFIAIHTGMRIGEIRALKIKNVDFVHISKITIDKAMDGYGNIKAPKTVASN | 240 |
| Int <sub>B-F</sub> | DHLNNDSQLAIFIAIHTGMRIGEIRALKIKNVDFVQSKITIDKAMDGYGKIKAPKTAASN  | 240 |
| Int <sub>F</sub>   | RVIKIDKRLLDVLKGYKRVSGLLVQVTREAINHVLTCDLKHIGAKNVTFFHALRHSASHYL | 300 |
| Int <sub>B-F</sub> | RVIQIDKRLLDVLKRYKRVSGLLVQVTREAINHVLTCDLKKIEAKDVTFFHALRHSASHYL | 300 |
| Int <sub>F</sub>   | LSKGVSIQYVSERLGHSVAITENVYSHLLQTLRENEENKVTDLNMFQ               | 348 |
| Int <sub>B-F</sub> | LSKGVSIQYVSERLGHSNVTITENVYSHLLKTLRENEEKKITDLMDFQ              | 348 |

**Figure S2** Comparisons of the Int<sub>F</sub> and Int<sub>B</sub> protein sequences. Mutations are in grey. The four conserved amino acids in the C-terminal region (catalytic domain) of all integrases found in *O. oeni* are in red.

|                  |                                                                 |      |
|------------------|-----------------------------------------------------------------|------|
| Int <sub>F</sub> | ATGGCAACAAATTGCTTATCAATCCAAAAACAAAAACATACCGTGTTC-----AGATC      | 51   |
| PR <sub>F</sub>  | ATGGCAACCTATATGAAACGTGGTTCAACTTGGCAAGCACGTGTATCA-----           | 48   |
| Int <sub>D</sub> | ATGGCTTCAATTAAAAACGCGGAAAAATATTATCAAGCACGAGTATCCTACAGGGATCCA    | 60   |
|                  | ***** * * * *                                                   |      |
| Int <sub>F</sub> | ATTACTCCAGATCATAAGCGTGTGGCAAGTCGGGTTTTCATACAAAAACAGCAGCCAAA     | 111  |
| PR <sub>F</sub>  | -----AAGGATAAGCATCGATTCAATAAATCTGGTTTTGCTACCAAAAGAGAAGCAATT     | 102  |
| Int <sub>D</sub> | GTTACCGGAGAAATTCGGACCAAAAAATAAAGTGGTTTTCTTAAAAACAAAGATGCACAA    | 120  |
|                  | * * * * *                                                       |      |
| Int <sub>F</sub> | ACATGGCTAACCGAAAAACAGCTTAAAAATTGTTACCGGCAAAATCAGAAGTAAATAGTTCA  | 171  |
| PR <sub>F</sub>  | ATTGGGCTTCTAAATAG-----AATTAGGCGAAGAG--AATAAACCAAAAAAT           | 150  |
| Int <sub>D</sub> | ATCTGGGTTGGCCAAGTAT-----TATCTGGGAAACAACAAGAAAAAGAACAGCCT        | 171  |
|                  | * * * * *                                                       |      |
| Int <sub>F</sub> | CACGAATTATTGTCTGATTATTTTAAGCATTGGTATGAAACATATAAAACAAATGTAACG    | 231  |
| PR <sub>F</sub>  | AAATTTTATTTTCTGATTATTTTAAAAAATGGTATGAGACATATAAAACAAATCGGACC     | 210  |
| Int <sub>D</sub> | GACATACTTTTATCTGATTACTTTGAGAATTGGTACCTCACATATCGTGTCAACCGATCA    | 231  |
|                  | * * * * *                                                       |      |
| Int <sub>F</sub> | GATATAACGCTCGACCAGTACAAAAACGACTTATCGTATTATTGAAAAATATTTACCACAT   | 291  |
| PR <sub>F</sub>  | GATGTCACCTTTATTACAGTACAAAAACACTGACTATGTAAATGATAAATATTTAAAGGT    | 270  |
| Int <sub>D</sub> | AATCAACATATATACAGTATCGAGACACACTTCACACAATTAAGAAGTATTTGCCACAG     | 291  |
|                  | * * * * *                                                       |      |
| Int <sub>F</sub> | GTGCGACTGAATGATTTTACCGTGAGAAATATCAGAAATTTTAAACAAATATGGCGAA      | 351  |
| PR <sub>F</sub>  | GAAATTTTAAATAAGTAACTTAACCTCGGCTAAATTACAAACATTTATCAATGAATACGGCAA | 330  |
| Int <sub>D</sub> | ATGACTTTGAAATCGTTCACACGATCTAATTTTCAGACATTATTATAAATTTTGGTAAA     | 351  |
|                  | * * * * *                                                       |      |
| Int <sub>F</sub> | GATCAGCTAAAGAACTGTTGCTAAACGAAAAACACACATCTCAGCTTGTTTAAAGAC       | 411  |
| PR <sub>F</sub>  | GACCACGCTAAAGAGACTGCTCCAAAAACATAAGGGCATATTATCGCCTG-CTTAAAGAT    | 389  |
| Int <sub>D</sub> | GATCAGCTGAAAAACAGTACAAAAACGCAAGGGTCAAAATTCGCGCGCTTTAAAGAT       | 411  |
|                  | * * * * *                                                       |      |
| Int <sub>F</sub> | GCTTTTGCCGATAAAATTAATCAGTGAAGACATAACAACGATTGACCCTAACTGGTAAA     | 471  |
| PR <sub>F</sub>  | GCTTATCATGAAGGGCTAATCAAAACAGACGTTACTTTATAGATTGAATCTAGTCTATAAC   | 449  |
| Int <sub>D</sub> | GCCTAGCTGAAGAATTGATAAATAAGGATCCTACTATAAGAATTGGTTTGTGTACAAT      | 471  |
|                  | * * * * *                                                       |      |
| Int <sub>F</sub> | GCCGGCA-----AGTCGTGAGAGCTTAAATCTTGGAGTATGAAGATTTAAGAACTTA       | 525  |
| PR <sub>F</sub>  | CAAAAAATATCAAAACCAATCGAAGAAAAATTCCTAGAGGCAGAAAGCAGCATAAATC      | 509  |
| Int <sub>D</sub> | AATGCAACTAAAGTGCTTATTGAAAAATAATTTGGAATTGAATGAAGCTGAAAAATTG      | 531  |
|                  | * * * * *                                                       |      |
| Int <sub>F</sub> | GAGCAATATTCATATGATCATCTCAATAACGATTACAGCTGGCTATTTTATAGCTATT      | 585  |
| PR <sub>F</sub>  | GTGCTTATTGCGAAAAAGACATCACTA-----GAGGCAACTTTTGTATTCTGACCGGTATT   | 566  |
| Int <sub>D</sub> | ATAGACCTTGTATTAAGAACCTATCTA-----GGGTAATTTTATGATATTAAGTGTCTT     | 588  |
|                  | * * * * *                                                       |      |
| Int <sub>F</sub> | CATACAGGCATGCGAATAGGTGAATTAAGCTTTAAAGATTAAAAATGTAGATTTTGTG      | 645  |
| PR <sub>F</sub>  | CTATCAGGAGCCAGATTTGGTGAAGTTAGAGCCTTGATTGACAGTGATATAGACCAAG      | 626  |
| Int <sub>D</sub> | CTGTACAGGAGCAAGATTTGGTGAAGCTTCGAGCATTAACCGATGCAGATATCGATACCAA   | 648  |
|                  | * * * * *                                                       |      |
| Int <sub>F</sub> | CATCTCTAAATTAATCTATGATAAGCTATGGACGGTTATGGCAATATCA-----AAGCACCA  | 702  |
| PR <sub>F</sub>  | AACCACTATTTAGTATTAACAAGGCTGTTGATAGGCTAACAGGAAAGATAAGGAAACC      | 686  |
| Int <sub>D</sub> | AAACATCTCATCTCTATTACTAAGCAGTTGATAAATTTACCAATAAGGATAAAGCTCCA     | 708  |
|                  | * * * * *                                                       |      |
| Int <sub>F</sub> | AAAAACGGTCGCTAGTAACCGTGTAATTAATCGATAAACGATTATTAGACGTATTTAAAG    | 762  |
| PR <sub>F</sub>  | AAAAACAAGCAATCCCAAGAAATTATAGCTATGCCGACAGATGGTTTCAATATATAAG      | 746  |
| Int <sub>D</sub> | AAAAACCAAGAAATCGATTAGAGAAATCATAATGCCGATAAATGGTTTGAAGTTTATAGT    | 768  |
|                  | * * * * *                                                       |      |
| Int <sub>F</sub> | GGATATAAGCGTGTCTGTTTATGGTACAAGTAACAAGAGAAGCAATTAACACGTT         | 822  |
| PR <sub>F</sub>  | AATTACAACCATGATGGAAGACGGCTTTTGACATCAGCTCAAACGCTATCAACAAAGAT     | 806  |
| Int <sub>D</sub> | GATTTCAAGCATAATGACAAGCGACTTTTGACATGACATCTAACGGAATCAACAAAGAC     | 828  |
|                  | * * * * *                                                       |      |
| Int <sub>F</sub> | CTAACGAAAGATTTAAAGCACATAGGGGCAAAAAACGTGACCTTTCATGCTTTGCGTCAC    | 882  |
| PR <sub>F</sub>  | ATGAGATATATCGCAAGAAAAATCGATATAAAGCCTGTACCTATCACGCTTTAAGGCAC     | 866  |
| Int <sub>D</sub> | TTAAATTTTATGTGAAAACTAGAAATCAAGCAGTTACGTTTTCAGCTTTAAGGCAT        | 888  |
|                  | * * * * *                                                       |      |
| Int <sub>F</sub> | AGCCATGCCAGCTATTTATTATCCAAAGGTGTTTCAATTCAATATGTATCCGAACGTTTG    | 942  |
| PR <sub>F</sub>  | ACTCAGCTTCAATGCTCTTGCCCAATAACGTTTCAATGCAATATGTTCCGAAAGATTA      | 926  |
| Int <sub>D</sub> | ACGATGCTTCAATGCTATTAGCACATGATATTCAATGCAATATGTGCTGGAAGATTA       | 948  |
|                  | * * * * *                                                       |      |
| Int <sub>F</sub> | GGGCAATCCAGTGTGCTATCAGAAAAATGTTTACTCTCATCTACTCAAACGTTTACGG      | 1002 |
| PR <sub>F</sub>  | GGACACGCTAATCTATCAATCAGGAAAAAGTCTACTCTCACCTACTTGAAGATAAGAGA     | 986  |
| Int <sub>D</sub> | GGACATGCCAATCTTTCGATAACAGAACAGGTATATTTCGCATCTTTTAGAAGAAAAAGAA   | 1008 |
|                  | * * * * *                                                       |      |
| Int <sub>F</sub> | GAAACGAAGAAAAACAGGTCACGTATTTAATGAATTTTCAGTGA                    | 1047 |
| PR <sub>F</sub>  | AAGAAGAGAAAAAAGGGCGATGGATATTTTAA-----                           | 1022 |
| Int <sub>D</sub> | AATCAAGAGAAATGAAGCAATGAAGATATTTAG-----                          | 1044 |
|                  | * * * * *                                                       |      |

**Figure S3** Alignments of the nucleotide sequences of the integrase genes from PR<sub>F</sub> and Int<sub>F</sub> and Int<sub>D</sub> prophages. The yellow color represents deletions in *intPR<sub>F</sub>* and *intD*, sequences. The blue color represents deletions only observed in the *intF* sequence.
